# Supplementary material for: A semi-automated luminescence based standard membrane feeding assay identifies novel small molecules that inhibit transmission of malaria parasites by mosquitoes
Source: PubMed Central journal article supplement (PMC4685452; doi:10.1038/srep18704), 2015-12-21
Supplement: srep18704-s1.pdf [file srep18704-s1.pdf]

**A semi-automated luminescence based standard membrane feeding assay identifies novel small molecules that inhibit transmission of malaria parasites by mosquitoes**

Martijn W. Vos<sup>1,†</sup>, Will J. R. Stone<sup>2,†</sup>, Karin M. Koolen<sup>1</sup>, Geert-Jan van Gemert<sup>2</sup>, Ben van Schaijk<sup>2</sup>, Didier Leroy<sup>3</sup>, Robert W. Sauerwein<sup>1,2</sup>, Teun Bousema<sup>2</sup>, Koen J. Dechering<sup>1,\*</sup>

<sup>1</sup>TropiQ Health Sciences, PO Box 9101, 6500 HB Nijmegen, The Netherlands

<sup>2</sup>Department of Medical Microbiology, Radboud University Nijmegen Medical Center, 6500 HB Nijmegen, The Netherlands

<sup>3</sup>Medicines for Malaria Venture, 20 Route de Pré-Bois, 1215 Geneva 15, Switzerland

<sup>†</sup>contributed equally

\*corresponding author. E-mail: k.dechering@tropiq.nl. Tel. +31-6-51483935

**SUPPLEMENTARY INFORMATION**

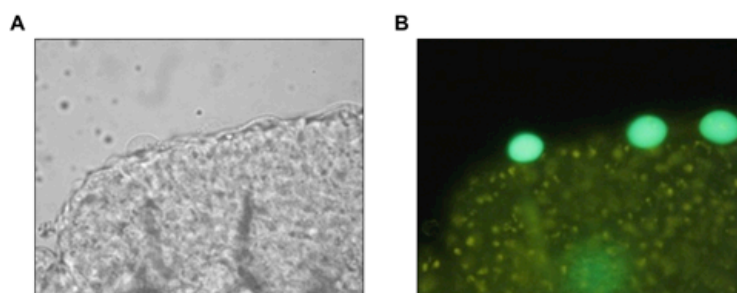

**Figure S1. A.** Brightfield micrograph of a section of mosquito midgut with 3 oocysts taken after mosquito dissection 6 days PI with NF54-HGL. **B.** Fluorescence micrograph of the same section of mosquito midgut with 3 oocysts taken after mosquito dissection 6 days PI with NF54-HGL.

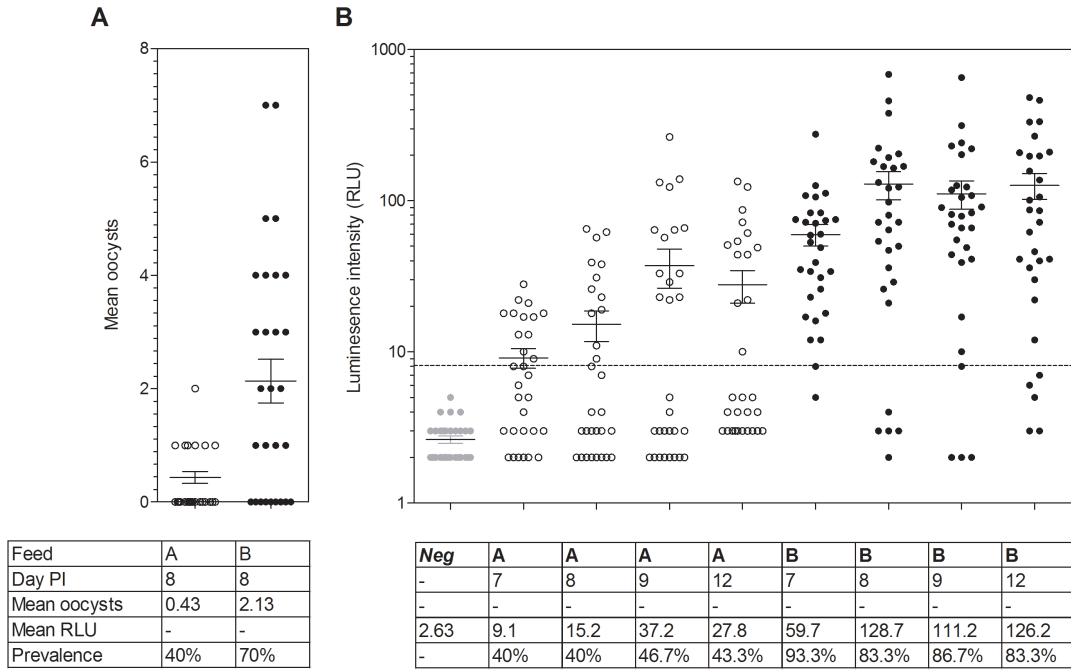

**Figure S2. A.** Oocyst intensity in individual mosquitoes from two groups of mosquitoes (*A* and *B*) infected with NF54-HGL, determined after dissection and standard midgut staining and microscopy at day 8 PI. **B.** Luminescence intensity in individual mosquitoes from the same two mosquito groups (*A* and *B*), assessed in separate mosquito samples removed from the primary mosquito storage cage at day 7, 8, 9 and 12 PI. The dashed line indicates the cut-off calculated statistically from the RLU values of all mosquitoes assayed in the current study (8.1 RLU). Prevalence estimates were based on this cut-off.

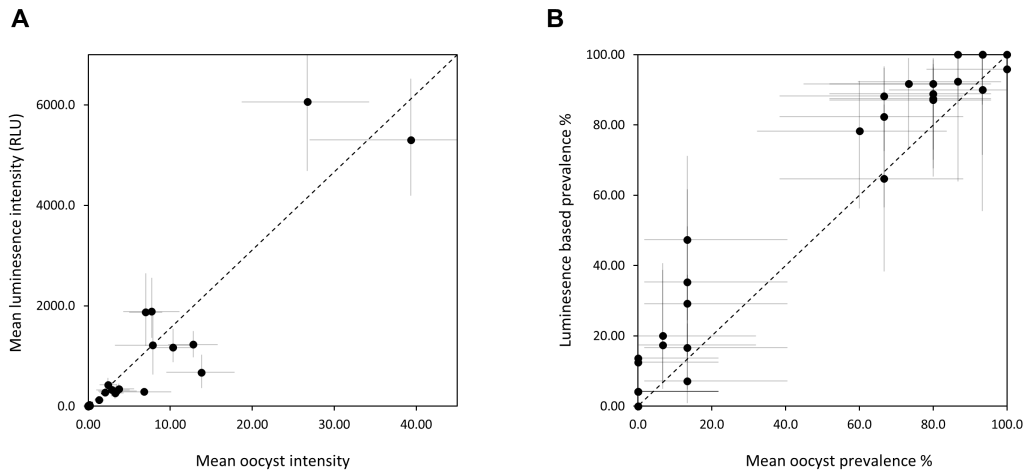

**Figure S3. A.** Relative oocyst and luminescence intensity among mosquitoes sampled from the same cages fed blood-meals without the addition of a test compound (16 feeds, 480 mosquitoes) or with the addition of DHA (16 feeds, 711 mosquitoes). **B.** Relative infection prevalence based on the observation of oocysts or calculated from luminescence intensity, among mosquitoes sampled from the same cages fed blood-meals without the addition of a test compound (16 feeds, 480 mosquitoes) or with the addition of DHA (16 feeds, 711 mosquitoes).

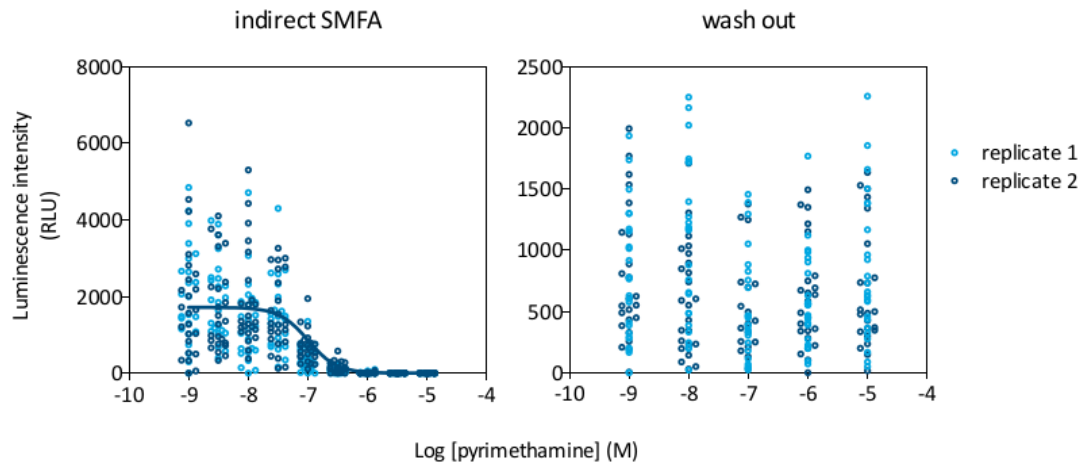

**Figure S4.** Efficacy of the washout protocol. The left panel shows the activity of pyrimethamine in the indirect SMFA as reported in Figure 2 of the main manuscript. The right panel shows the activity in the wash-out mode of the SMFA, where the compound was washed out prior to mosquito feeding.

| primer       | sequence 5'-3'                                                                        |
|--------------|---------------------------------------------------------------------------------------|
| MWV 257      | GTTAACGAAGTTCCTATACTATTGAAGAATAGGAACTTCACGCGTGCCGGCTATGGTACCGTACCTACTAACTGTTTTGAATCTC |
| MWV 259      | CCGCGGTTTCATTATGCTAACATACATG                                                          |
| MWV 262      | GCGCGGATTGGTAGTTGACTCATCTTG                                                           |
| MWV 267      | CGAATTCGAAGTTCCTATTCTCTAGAAAGTATAGGAACTTCCCGGCATAGTATCTACATAACTGAAGCAAG               |
| MWV 252      | GGTACCACTAGTCCCGGGATCAACCGGTATGAGTAAAGGAGAAGAACITTTCACTGG                             |
| MWV 253      | TTGAAGTTAACTTTGATTCCATTCTTTGTTGTCTG                                                   |
| MWV 198      | TATCCCGGGGCTAGCCGCATAAATATCTGGTGAATAC                                                 |
| MWV 200      | TATCGGATCCCTTTTGACTAGCCAATTTTC                                                        |
| MWV 268      | AATGGCCCGAATTCGCGGCTACCTATTTGATGAATTAATACTACAC                                        |
| MWV 271      | TCTAGATTGTCGACAGGATTTATATAATATTTATGTAATACTACAATGGG                                    |
| MWV 300 (P1) | TACATCAAATAACTCAGAGGGTAAC                                                             |
| MWV 301 (P2) | GTTTGTATATTTACCTTACATTTATCTCC                                                         |

**Table S1.** List of DNA primer sequences as described in methods.
